# Supplementary material for: Seroprevalence of Anti-SARS-CoV-2 Antibodies in Blood Donors from Nuevo Leon State, Mexico, during 2020: A Retrospective Cross-Sectional Evaluation
Source: MDPI journal article supplement (doi:10.3390/v13071225), 2021-06-24
Supplement: s1 [file s1]

## Supplementary Materials

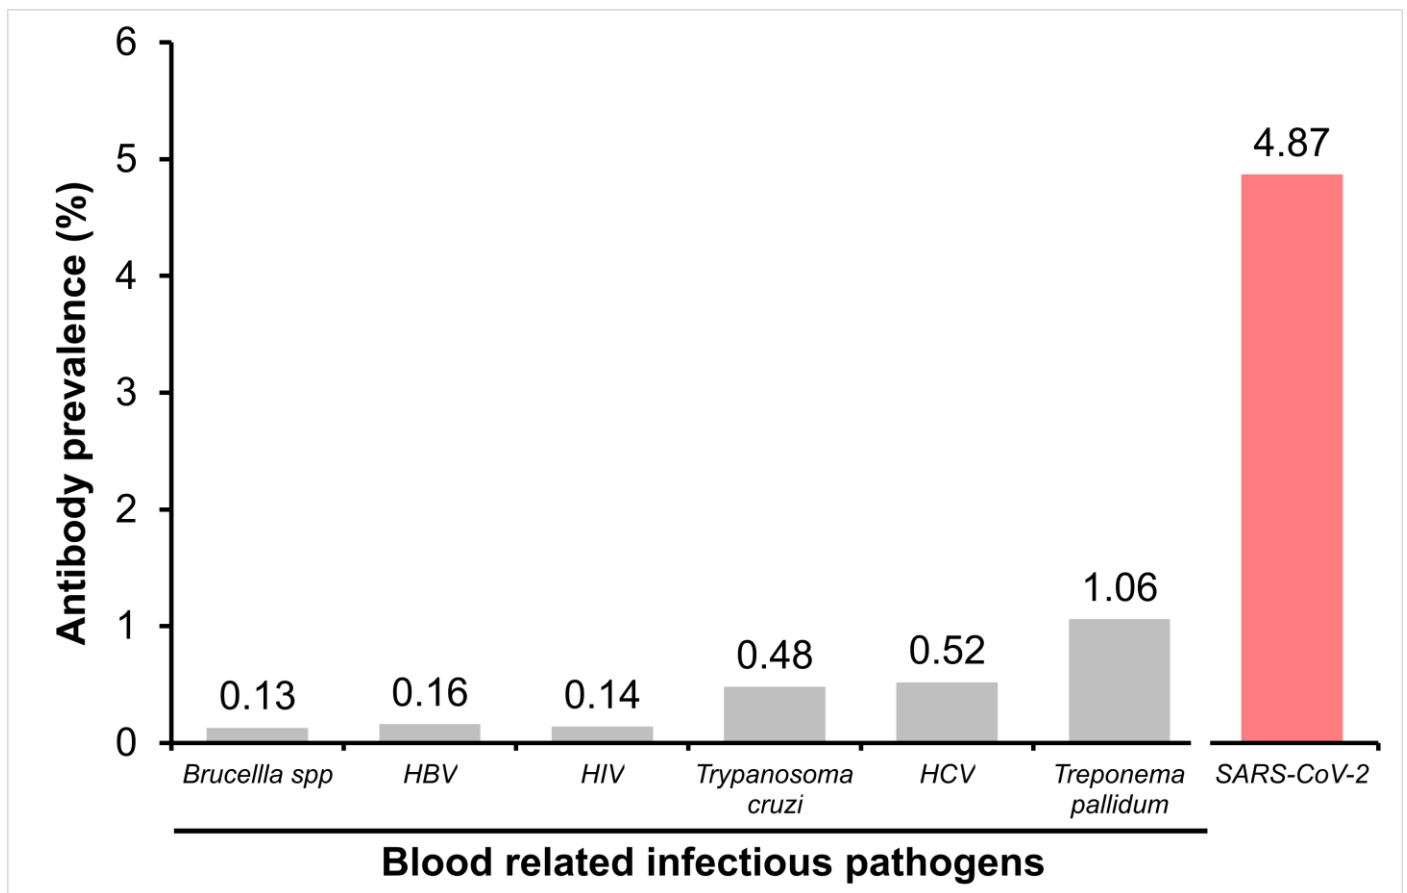

**Figure S1.** Comparison of prevalence of SARS-CoV-2 IgG antibodies observed against other blood-borne infectious diseases during the same period.

**Table S1.** Blood donor's characteristics and crude prevalence of antibodies to SARS-CoV-2 in the collected samples from Nuevo Leon Area, Mexico, during the pandemic period (epi week 11 to 51 of 2020).

| Variable                 | Group         | Collected samples (n=2031) | Seropositive cases | Case distribution per group (%) | Prevalence per group | <i>p</i> -value <sup>a</sup> |
|--------------------------|---------------|----------------------------|--------------------|---------------------------------|----------------------|------------------------------|
| <b>Pandemic Period</b>   | <b>Total</b>  | <b>2031</b>                | <b>(n = 99)</b>    | <b>-</b>                        | <b>4.87%</b>         |                              |
| <b>Sex</b>               | <b>M</b>      | 1497                       | 65                 | 65.65%                          | 4.34%                | 0.0436                       |
|                          | <b>F</b>      | 534                        | 34                 | 34.46%                          | 6.36%                |                              |
| <b>Age group</b>         | <b>18-29</b>  | 742                        | 41                 | 41.41%                          | 5.53%                | 0.514                        |
|                          | <b>30-49</b>  | 1098                       | 48                 | 48.48%                          | 4.37%                |                              |
|                          | <b>50-65</b>  | 191                        | 10                 | 10.10%                          | 5.24%                |                              |
| <b>ABO blood type</b>    | <b>A</b>      | 501                        | 28                 | 28.28%                          | 5.59%                | 0.8306                       |
|                          | <b>B</b>      | 139                        | 7                  | 7.07%                           | 5.04%                |                              |
|                          | <b>AB</b>     | 16                         | 1                  | 1.01%                           | 6.25%                |                              |
|                          | <b>O</b>      | 1375                       | 63                 | 63.64%                          | 4.58%                |                              |
| <b>RH Blood type</b>     | <b>+</b>      | 1946                       | 94                 | 94.95%                          | 4.83%                | 0.6593                       |
|                          | <b>-</b>      | 85                         | 5                  | 5.05%                           | 5.88%                |                              |
| <b>Educational level</b> | <b>Basic</b>  | 962                        | 19                 | 19.19%                          | 1.98%                | <0.0001                      |
|                          | <b>Middle</b> | 617                        | 38                 | 38.38%                          | 6.16%                |                              |
|                          | <b>Higher</b> | 452                        | 42                 | 42.42%                          | 9.29%                |                              |

**Table S2.** Variable association to SARS-CoV-2 risk of infection

|                          |          | OR    | 95% C.I. |       | P*    |
|--------------------------|----------|-------|----------|-------|-------|
|                          |          |       | Lower    | Upper |       |
| <b>Sex</b>               |          |       |          |       |       |
|                          | Female   | 1     |          |       |       |
|                          | Male     | 0.679 | 0.436    | 1.058 | 0.087 |
| <b>Age</b>               |          |       |          |       |       |
|                          | 19-29    | 1     |          |       |       |
|                          | 30-49    | 0.823 | 0.517    | 1.310 | 0.411 |
|                          | 50-65    | 0.924 | 0.429    | 1.994 | 0.841 |
| <b>ABO Blood Type</b>    |          |       |          |       |       |
|                          | A        | 1     |          |       |       |
|                          | B        | 1.038 | 0.437    | 2.463 | 0.932 |
|                          | O        | 0.862 | 0.533    | 1.395 | 0.546 |
|                          | AB       | 1.183 | 0.148    | 9.458 | 0.874 |
| <b>RH</b>                |          |       |          |       |       |
|                          | Negative | 1     |          |       |       |
|                          | Positive | 0.759 | 0.298    | 1.936 | 0.564 |
| <b>Educational Level</b> |          |       |          |       |       |
|                          | Basic    | 1     |          |       |       |
|                          | Medium   | 1.132 | 0.700    | 1.832 | 0.613 |
|                          | High     | 0.818 | 0.457    | 1.463 | 0.498 |

**Table S3.** Geographical distribution of tested samples across Nuevo Leon region and COVID-19 positivity ratio observed.Nd= No data.

| Municipality           | Samples | IgG(+) | %     |
|------------------------|---------|--------|-------|
| Abasolo                | 3       | 0      | 0.0%  |
| Aguaaleguas            | 0       | Nd     | Nd    |
| Los Aldama             | 3       | 0      | 0.0%  |
| Allende                | 14      | 2      | 14.3% |
| Anahuac                | 6       | 0      | 0.0%  |
| Apodaca                | 185     | 12     | 6.5%  |
| Aramberri              | 5       | 0      | 0.0%  |
| Bustamante             | 6       | 1      | 16.7% |
| Cadereyta Jimenez      | 48      | 3      | 6.3%  |
| El Carmen              | 32      | 1      | 3.1%  |
| Cerralvo               | 3       | 0      | 0.0%  |
| China                  | 4       | 0      | 0.0%  |
| Cienega De Flores      | 6       | 2      | 33.3% |
| Doctor Arroyo          | 2       | 1      | 50.0% |
| Doctor Coss            | 0       | Nd     | Nd    |
| Doctor Gonzalez        | 5       | 0      | 0.0%  |
| Galeana                | 10      | 0      | 0.0%  |
| Garcia                 | 158     | 6      | 3.8%  |
| San Pedro Garza Garcia | 37      | 1      | 2.7%  |
| General Bravo          | 0       | Nd     | Nd    |
| General Escobedo       | 193     | 10     | 5.2%  |
| General Teran          | 1       | 0      | 0.0%  |
| General Treviño        | 1       | 0      | 0.0%  |
| General Zaragoza       | 1       | 0      | 0.0%  |
| General Zuazua         | 19      | 1      | 5.3%  |
| Guadalupe              | 223     | 8      | 3.6%  |
| Los Herrera            | 2       | 0      | 0.0%  |
| Higueras               | 0       | Nd     | Nd    |
| Hualahuises            | 0       | Nd     | Nd    |
| Iturbide               | 0       | Nd     | Nd    |
| Juarez                 | 164     | 8      | 4.9%  |
| Lampazos De Naranjo    | 1       | 0      | 0.0%  |
| Linares                | 19      | 1      | 5.3%  |
| Marin                  | 2       | 0      | 0.0%  |
| Melchor Ocampo         | 0       | Nd     | Nd    |
| Mier Y Noriega         | 4       | 0      | 0.0%  |
| Mina                   | 4       | 0      | 0.0%  |
| Montemorelos           | 20      | 1      | 5.0%  |

|                                 |     |    |      |
|---------------------------------|-----|----|------|
| <b>Monterrey</b>                | 499 | 24 | 4.8% |
| <b>Paras</b>                    | 0   | Nd | Nd   |
| <b>Pesqueria</b>                | 25  | 2  | 8.0% |
| <b>Los Ramones</b>              | 3   | 0  | 0.0% |
| <b>Rayones</b>                  | 0   | Nd | Nd   |
| <b>Sabinas Hidalgo</b>          | 8   | 0  | 0.0% |
| <b>Salinas Victoria</b>         | 23  | 1  | 4.3% |
| <b>San Nicolas De Los Garza</b> | 115 | 6  | 5.2% |
| <b>Hidalgo</b>                  | 8   | 0  | 0.0% |
| <b>Santa Catarina</b>           | 92  | 1  | 1.1% |
| <b>Santiago</b>                 | 28  | 1  | 3.6% |
| <b>Vallecillo</b>               | 1   | 0  | 0.0% |
| <b>Villaldama</b>               | 0   | Nd | Nd   |
| <b>No Municipality</b>          | 2   | 1  |      |
| <b>Other States/</b>            | 83  | 5  |      |
